# Supplementary material for: N-alkyl functionalised expanded ring N-heterocyclic carbene complexes of rhodium(i) and iridium(i): structural investigations and preliminary catalytic evaluation
Source: Royal Society of Chemistry journal article supplement (doi:10.1039/c2dt32823b), 2012-12-19
Supplement: c2dt32823b.pdf [file c2dt32823b.pdf]

## Supplementary Information

# **N-Alkyl Functionalised Expanded Ring N-Heterocyclic Carbene Complexes of Rhodium & Iridium(I): Structural Investigations & Catalytic Application**

**Jay J. Dunsford, Dorette S. Tromp, Kingsley J. Cavell, Cornelis J. Elsevier, &  
Benson M. Kariuki**

*School of Chemistry, Main Building, Cardiff University, Cardiff CF10 3AT.*

*Email: CavellKJ@cf.ac.uk*

**Structure Refinement Data for Compounds 4, 5, 6, 10 and 14**

**S2**

|                                                         | <b>4</b>                 | <b>5</b>               | <b>6</b>             |
|---------------------------------------------------------|--------------------------|------------------------|----------------------|
| Empirical formula                                       | C14 H28 Br N2            | C12 H25 Cl2 I N2       | C15 H30 I N2         |
| Fw/g mol <sup>-1</sup>                                  | 304.29                   | 395.14                 | 365.31               |
| Cryst syst, space group                                 | Orthorhombic,<br>P212121 | Orthorhombic,<br>Pna21 | Monoclinic,<br>P21/n |
| a/Å                                                     | 7.0089(5)                | 25.0834(6)             | 13.2298(2)           |
| b/Å                                                     | 13.0334(12)              | 10.1732(3)             | 8.9506(2)            |
| c/Å                                                     | 18.072(2)                | 13.7406(3)             | 15.5722(3)           |
| α/deg                                                   | 90                       | 90                     | 90                   |
| β/deg                                                   | 90                       | 90                     | 103.0750(10)         |
| γ/deg                                                   | 90                       | 90                     | 90                   |
| Vol/Å <sup>3</sup>                                      | 1650.9(3)                | 3506.31(15)            | 1796.17(6)           |
| Z, calc density (Mg m <sup>-3</sup> )                   | 4, 1.224                 | 8, 1.497               | 4, 1.351             |
| Abs coeff (mm <sup>-1</sup> )                           | 2.476                    | 2.117                  | 1.773                |
| F(000)                                                  | 644                      | 1584                   | 748                  |
| Cryst                                                   | Needle, colourless       | Block, colourless      | Needle, colourless   |
| Cryst dimens/mm <sup>3</sup>                            | 0.35 x 0.08 x 0.08       | 0.25 x 0.25 x 0.13     | 0.35 x 0.12 x 0.10   |
| θ range (deg)                                           | 2.74 - 25.24             | 1.62 - 30.48           | 2.64 - 28.27         |
| No. of reflns collected/unique                          | 2897/2897                | 19185/8832             | 8565/4426            |
| R <sub>int</sub>                                        | 0.0100                   | 0.0377                 | 0.0689               |
| No. of data/restraints/parameters                       | 2897/0/161               | 8832/1/317             | 4426/0/170           |
| Final R indices [F <sup>2</sup> < 2θ(F <sup>2</sup> )]: | 0.0559, 0.1079           | 0.0731, 0.1873         | 0.0689, 0.1380       |
| R indices (all data): R1, wR2                           | 0.1654, 0.1178           | 0.1184, 0.2361         | 0.1126, 0.1554       |
| Largest diff peak and hole/e<br>Å <sup>-3</sup>         | 0.869, -0.432            | 1.019, -1.178          | 1.170, -1.032        |

|                                                         | <b>10</b>          | <b>14</b>          |
|---------------------------------------------------------|--------------------|--------------------|
| Empirical formula                                       | C22 H40 Cl Ir N2   | C23 H42 Cl Ir N2   |
| Fw/g mol <sup>-1</sup>                                  | 560.21             | 574.24             |
| Cryst syst, space group                                 | Orthorhombic, Pbca | Monoclinic, P21/a  |
| a/Å                                                     | 18.6021(3)         | 11.5140(3)         |
| b/Å                                                     | 12.6261(2)         | 15.0802(5)         |
| c/Å                                                     | 19.3427(3)         | 14.4033(5)         |
| α/deg                                                   | 90                 | 90                 |
| β/deg                                                   | 90                 | 107.804(2)         |
| γ/deg                                                   | 90                 | 90                 |
| Vol/Å <sup>3</sup>                                      | 4543.06(12)        | 2381.12(13)        |
| Z, calc density (Mg m <sup>-3</sup> )                   | 8, 1.638           | 4, 1.602           |
| Abs coeff (mm <sup>-1</sup> )                           | 6.004              | 5.730              |
| F(000)                                                  | 2240               | 1152               |
| Cryst                                                   | Needle, yellow     | Plate, yellow      |
| Cryst dimens/mm <sup>3</sup>                            | 0.30 x 0.25 x 0.20 | 0.15 x 0.15 x 0.06 |
| θ range (deg)                                           | 2.72 - 28.31       | 2.70 - 28.27       |
| No. of reflns collected/unique                          | 18940/5622         | 11361/5876         |
| R <sub>int</sub>                                        | 0.0630             | 0.0526             |
| No. of data/restraints/parameters                       | 5622/0/241         | 5876/0/251         |
| Final R indices [F <sup>2</sup> < 2θ(F <sup>2</sup> )]: | 0.0646, 0.1163     | 0.0628, 0.1515     |
| R indices (all data): R1, wR2                           | 0.0891, 0.1249     | 0.0928, 0.1759     |
| Largest diff peak and hole/e<br>Å <sup>-3</sup>         | 2.658, -2.313      | 1.993, -1.504      |
